# Supplementary material for: High lithium ion battery performance enhancement by controlled carbon coating of TiO2 hierarchically porous hollow spheres
Source: Royal Society of Chemistry journal article supplement (doi:10.1039/c6ra14895f), 2016-01-01
Supplement: c6ra14895f1.pdf [file c6ra14895f1.pdf]

## Supporting Information

### **High Lithium Ion Battery Performance Enhancement by Controlled Carbon Coating of TiO<sub>2</sub> Hierarchically Porous Hollow Spheres**

Jun Jin<sup>a</sup>, Xiao-Ning Ren<sup>a</sup>, Yi Lu<sup>a</sup>, Xian-Feng Zheng<sup>a</sup>, Hong-En Wang<sup>a</sup>, Li-Hua Chen<sup>a</sup>, Xiao-Yu Yang<sup>a</sup>, Yu Li<sup>a,\*</sup> and Bao-Lian Su<sup>a, b, c, \*</sup>

*<sup>a</sup>Laboratory of Living Materials at the State Key Laboratory of Advanced Technology for Materials Synthesis and Processing, Wuhan University of Technology, 122 Luoshi Road, 430070, Wuhan, Hubei, China; Email: [yu.li@whut.edu.cn](mailto:yu.li@whut.edu.cn) and [baoliansu@whut.edu.cn](mailto:baoliansu@whut.edu.cn)*

*<sup>b</sup>Laboratory of Inorganic Materials Chemistry (CMI), University of Namur, 61 rue de Bruxelles, B-5000 Namur, Belgium; E-mail: [bao-lian.su@unamur.be](mailto:bao-lian.su@unamur.be)*

*<sup>c</sup>Department of Chemistry and Clare Hall, University of Cambridge, Cambridge CB21 9EW, United Kingdom; E-mail: [bls26@cam.ac.uk](mailto:bls26@cam.ac.uk)*

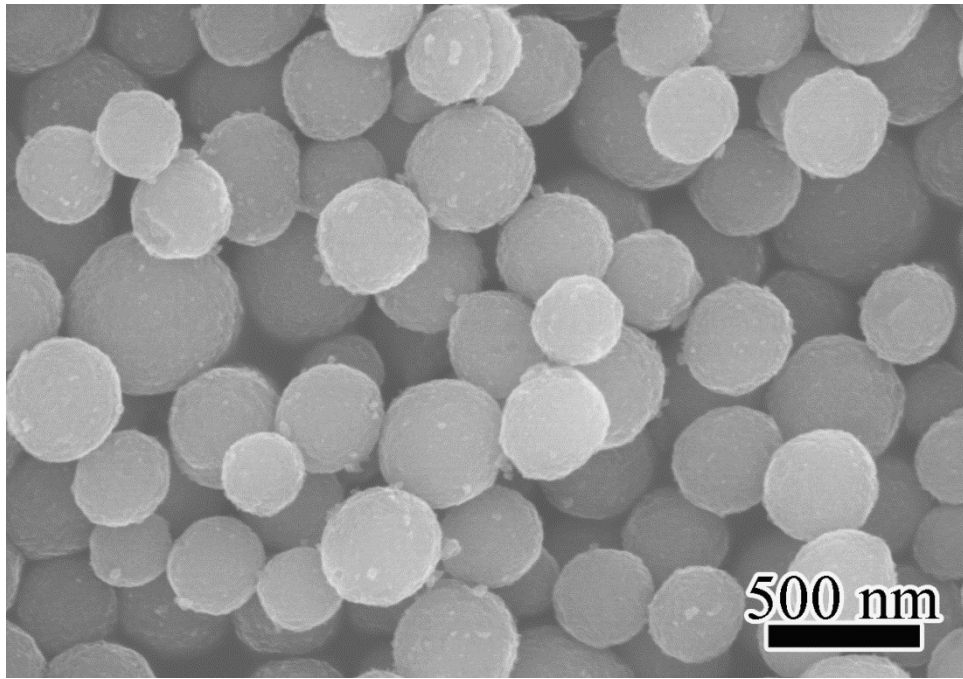

**Fig. S1.** The SEM image of the TiO<sub>2</sub> solid spheres (TSS).

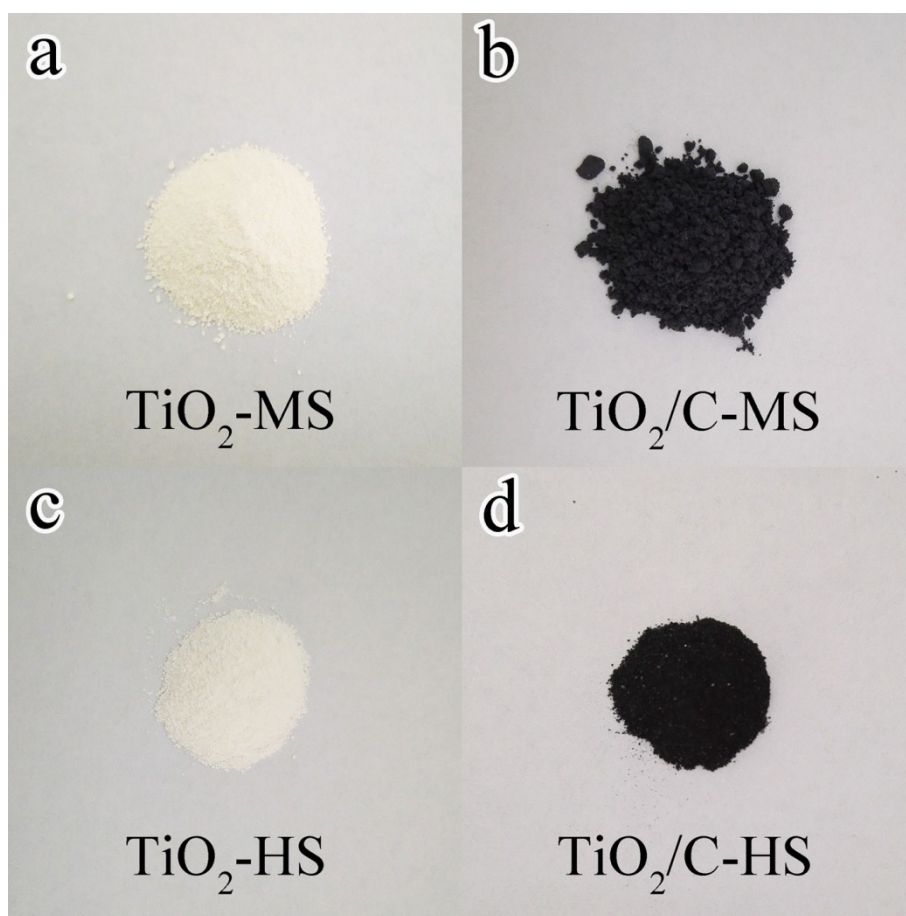

**Fig. S2.** The optical images of the  $\text{TiO}_2\text{-MS}$ ,  $\text{TiO}_2/\text{C-MS}$ ,  $\text{TiO}_2\text{-HS}$  and  $\text{TiO}_2/\text{C-HS}$  powders.

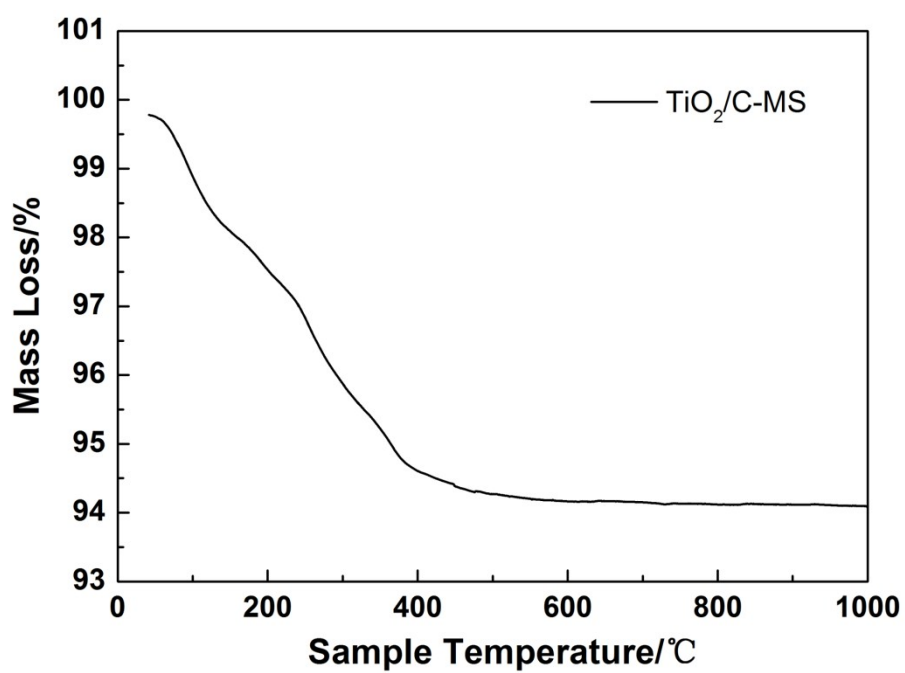

**Fig. S3.** TG curve of TiO<sub>2</sub>/C-MS under an air flow at temperature ramp of 5 °C min<sup>-1</sup>.

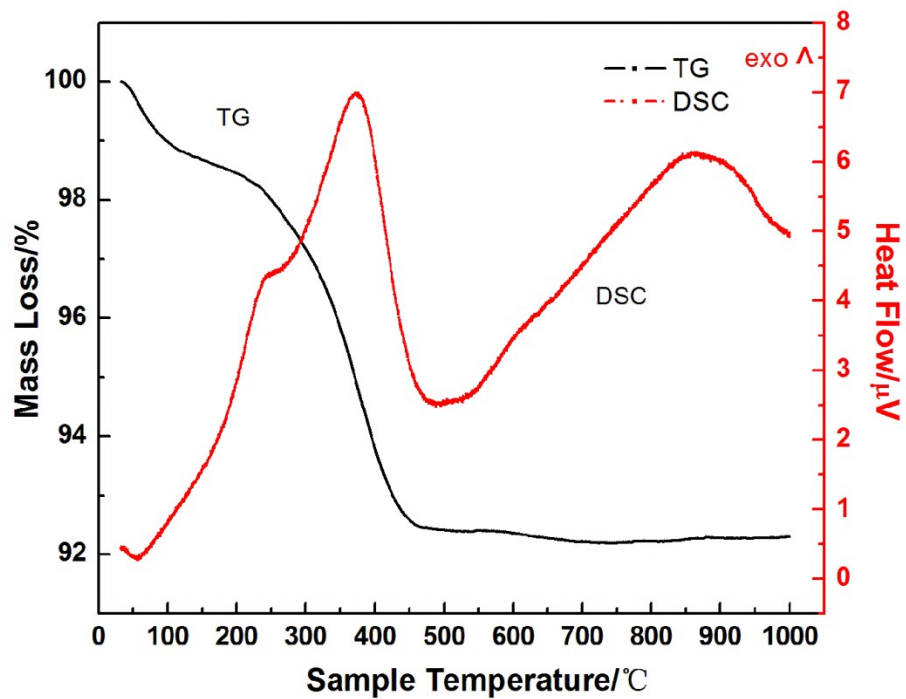

**Fig. S4.** TG and DSC curves of  $\text{TiO}_2/\text{C-HS}$  under an air flow at temperature ramp of  $5\text{ }^\circ\text{C min}^{-1}$ .

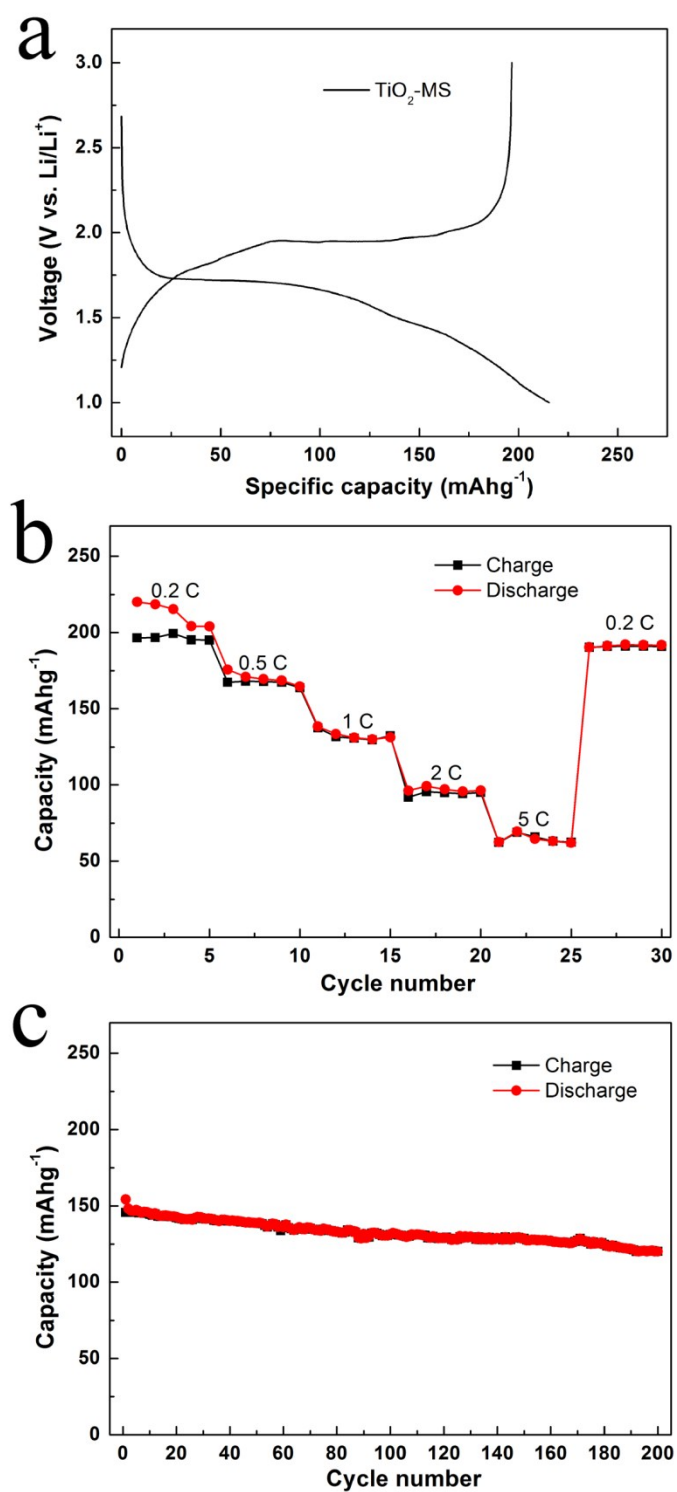

**Fig.S5.** (a) Charge and discharge curves of  $\text{TiO}_2\text{-MS}$  at a current of 0.2 C for the first cycle, (b) rate performance of  $\text{TiO}_2\text{-MS}$ , (c) cycle performance of  $\text{TiO}_2\text{-MS}$  at a current density of 1 C.

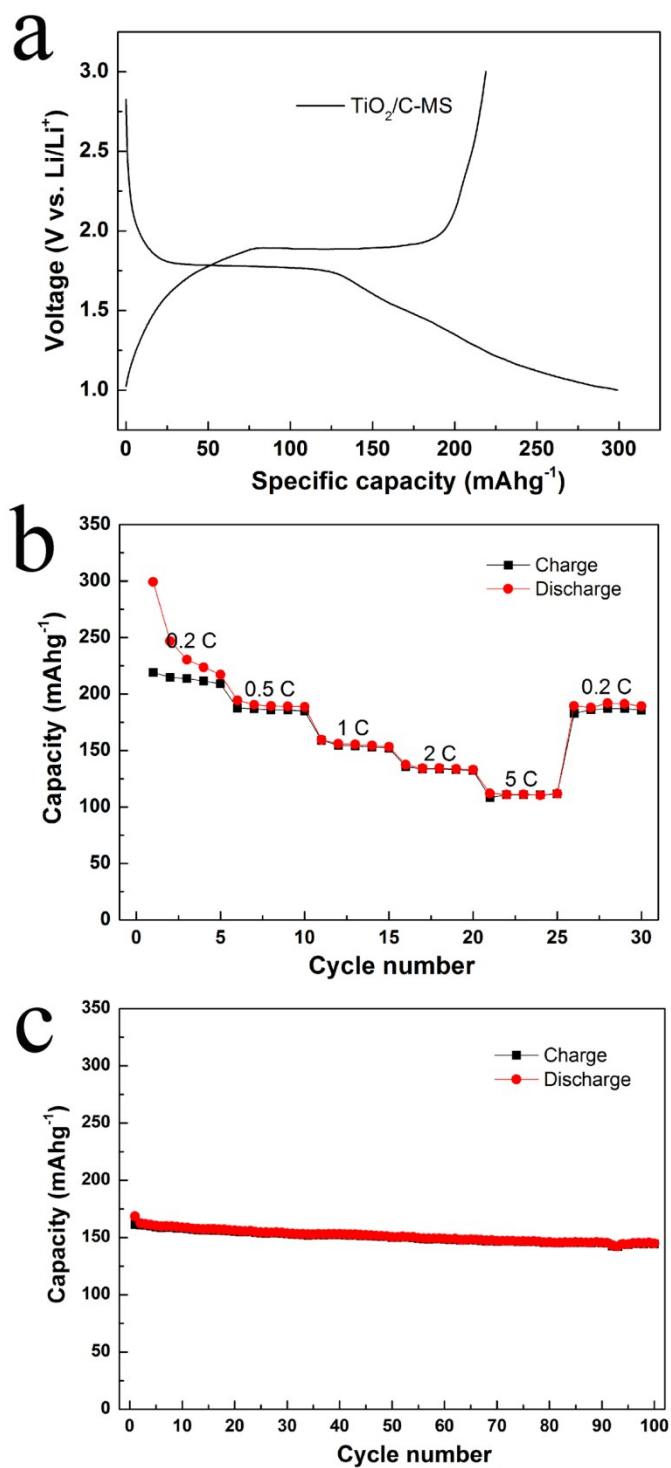

**Fig.S6.** (a) Charge and discharge curves of  $\text{TiO}_2/\text{C-MS}$  at a current of 0.2 C for the first cycle, (b) rate performance of  $\text{TiO}_2/\text{C-MS}$ , (c) cycle performance of  $\text{TiO}_2/\text{C-MS}$  at a current density of 1 C.
